# Supplementary material for: Genetic Diversity and Synergistic Modulation of Salinity Tolerance Genes in Aegilops tauschii Coss
Source: MDPI journal article supplement (doi:10.3390/plants10071393), 2021-07-07
Supplement: s1 [file s1]

Table S1. Populations informations.

| Code | Population | Collection location                                                                              | Province |
|------|------------|--------------------------------------------------------------------------------------------------|----------|
| 1    | HL-1       | Qianyuan Village, Kongyu Guo Town, Lucheng County, Luohe City, Henan Province China              | Henan    |
| 2    | SP-1       | Guandao Village, Houzhen Township, Lantian County, Weinan City, Shaanxi Province China           | Shaanxi  |
| 3    | SP-2       | Guandao Village, Houzhen Township, Lantian County, Weinan City, Shaanxi Province China           | Shaanxi  |
| 4    | SP-3       | Guandao Village, Houzhen Township, Lantian County, Weinan City, Shaanxi Province China           | Shaanxi  |
| 5    | SNP-1      | Dongwu Village, Wenkou Town, Daiyue County, Tai'an City, Shandong Province China                 | Shandong |
| 6    | SNP-2      | Dongwu Village, Wenkou Town, Daiyue County, Tai'an City, Shandong Province China                 | Shandong |
| 7    | SNP-3      | Dongwu Village, Wenkou Town, Daiyue County, Tai'an City, Shandong Province China                 | Shandong |
| 8    | SNP-4      | Dongwu Village, Wenkou Town, Daiyue County, Tai'an City, Shandong Province China                 | Shandong |
| 9    | SNP-5      | Dongwu Village, Wenkou Town, Daiyue County, Tai'an City, Shandong Province China                 | Shandong |
| 10   | SNP-6      | Dongwu Village, Wenkou Town, Daiyue County, Tai'an City, Shandong Province China                 | Shandong |
| 11   | SAXP-1     | Longmen Village, Lumenkou Park Town, Hejin County, Yuncheng City, Shanxi Province China          | Shanxi   |
| 12   | SAXP-2     | Xiwang Village, Chaijia Town, Hejin County, Yuncheng City, Shanxi Province China                 | Shanxi   |
| 13   | SAXP-3     | Xiwang Village, Chaijia Town, Hejin County, Yuncheng City, Shanxi Province China                 | Shanxi   |
| 14   | SAXP-4     | Xiwang Village, Chaijia Town, Hejin County, Yuncheng City, Shanxi Province China                 | Shanxi   |
| 15   | HP-1       | Qugou Village, Guanglu Town, Ci County, Bengbu City, Hebei Province China                        | Hebei    |
| 16   | HP-2       | Qugou Village, Guanglu Town, Ci County, Bengbu City, Hebei Province China                        | Hebei    |
| 17   | HP-3       | Qugou Village, Guanglu Town, Ci County, Bengbu City, Hebei Province China                        | Hebei    |
| 18   | HP-4       | Qugou Village, Guanglu Town, Ci County, Bengbu City, Hebei Province China                        | Hebei    |
| 19   | HP-5       | Qugou Village, Guanglu Town, Ci County, Bengbu City, Hebei Province China                        | Hebei    |
| 20   | HP-6       | Qugou Village, Guanglu Town, Ci County, Bengbu City, Hebei Province China                        | Hebei    |
| 21   | HP-7       | Qugou Village, Guanglu Town, Ci County, Bengbu City, Hebei Province China                        | Hebei    |
| 22   | HP-8       | Qugou Village, Guanglu Town, Ci County, Bengbu City, Hebei Province China                        | Hebei    |
| 23   | HP-9       | Qugou Village, Guanglu Town, Ci County, Bengbu City, Hebei Province China                        | Hebei    |
| 24   | HP-10      | Qugou Village, Guanglu Town, Ci County, Bengbu City, Hebei Province China                        | Hebei    |
| 25   | HP-11      | Qugou Village, Guanglu Town, Ci County, Bengbu City, Hebei Province China                        | Hebei    |
| 26   | HP-11      | Qugou Village, Guanglu Town, Ci County, Bengbu City, Hebei Province China                        | Hebei    |
| 27   | SNP-7      | Huangzhaizi Village, Dingyuanzhai Township, Guan County, Liaocheng City, Shandong Province China | Shandong |
| 28   | SNP-8      | Huangzhaizi Village, Dingyuanzhai Township, Guan County, Liaocheng City, Shandong Province China | Shandong |
| 29   | SNP-9      | Huangzhaizi Village, Dingyuanzhai Township, Guan County, Liaocheng City, Shandong Province China | Shandong |
| 30   | SAXP-5     | Shaqiao Village, Liucun Town, Yaodu District, Linyi City, Shanxi Province China                  | Shanxi   |
| 31   | HL-2       | Sanxiaoying Village, Huqiao Town, Hui County, Henan Province China                               | Henan    |
| 32   | HL-3       | Fanyu Village-1, Gaosi Town, Xiangcheng City, Henan Province China                               | Henan    |
| 33   | HL-4       | Fanyu Village, Gaosi Town, Xiangcheng City, Henan Province-2 China                               | Henan    |
| 34   | HL-5       | Xiaoluozhuang, Dawu Township, Shangshui County, Zhoukou City, Henan Province China               | Henan    |
| 35   | HL-6       | Qiliying, Xinxiang City, Henan Province                                                          | Henan    |
| 36   | HL-7       | Guzong Township, Yuyang District, Shangqiu City, Henan Province                                  | Henan    |
| 37   | HL-8       | Qihuazhuang, Jiaozuo City, Henan Province                                                        | Henan    |
| 38   | HL-9       | Dazhangzhuang, Zhaoacun Township, Ningling County, Shangqiu City, Henan Province                 | Henan    |

|    |        |                                                                |          |
|----|--------|----------------------------------------------------------------|----------|
| 39 | HL-10  | Wangjing Village, Neihuang County, Anyang City, Henan Province | Henan    |
| 40 | SNP-10 | Shandong Province                                              | Shandong |

---
